# Supplementary material for: Occupational status as a determinant of mental health inequities in French young people: is fairness needed? Results of a cross-sectional multicentre observational survey
Source: Springer Nature journal article supplement (doi:10.1186/s12939-017-0634-7), 2017-08-08
Supplement: MOESM1 [file 13445884]

## Additional file 1 Definitions about working according French rules

| English term                          | French term                                  | Definition                                                                                                            |
|---------------------------------------|----------------------------------------------|-----------------------------------------------------------------------------------------------------------------------|
| Permanent job                         | Contrat à Durée<br>Indéterminée (CDI)        |                                                                                                                       |
| Temporary job                         | Contrat à Durée<br>Déterminée (CDD)          |                                                                                                                       |
| Interim                               | CDD dans le cadre d'une<br>agence d'intérim  | Temporary job managed by temping agencies                                                                             |
| Specific employment<br>contract       | Contrat aidé                                 | Temporary job supporting by the French State<br>with reduced charge for the employer                                  |
| School/secondary<br>school            | Collège/Lycée                                |                                                                                                                       |
| At university                         | Etudiants à l'université                     |                                                                                                                       |
| Out of university                     | Etudiants hors université                    |                                                                                                                       |
| Training school                       | En apprentissage                             | Specific education for apprentice in an apprentice<br>training centre                                                 |
| Block release<br>training school      | Formation en alternance                      | School and work experience alternating                                                                                |
| Trainee in education                  | Stagiaire de la formation<br>professionnelle | Unemployment with registration in employment<br>agency performing professional training                               |
| In integrating into the<br>work place | En insertion                                 | Unemployment with registration in employment<br>agency and having specific contract for integration<br>in social life |
| Job seeking                           | En recherche d'emploi                        | Unemployment with registration in employment<br>agency and job seeking                                                |
| Unemployed                            | Sans activité                                | Unemployment without registration in employment<br>agency or struck off the employment agency                         |
